# Supplementary material
Source: PubMed Central journal article supplement (PMC1976235)

*wt*

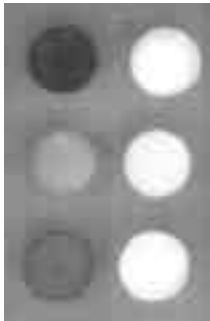

*mei4*

*mik1 wee1*

*mei4 mik1 wee1*

*wee1*

*mei4 wee1*

Supplement: pnas_0702906104_5.pdf [file pnas_0702906104_5.pdf]
